# Supplementary material for: A Damaged Oxidative Phosphorylation Mechanism Is Involved in the Antifungal Activity of Citral against Penicillium digitatum
Source: Front Microbiol. 2018 Feb 16;9:239. doi: 10.3389/fmicb.2018.00239 (PMC5820319; doi:10.3389/fmicb.2018.00239)
Supplement: Supplementary file 6 [file Table6.XLSX]

## Sheet: Supplemental data Table S6 CK30
Table S6. The up-regulated proteins in untreated Penicillium digitatum (CK30) and citral-treated P. digitatum (T30) (P < 0.05).
Hits	Accession	Desription	Mass	Seq	Score	Cov	SameSets	Spectrum	Unique Spectrum	Peptide	Unique Peptide	CK30-VS-T30@Ratio@set,CK30_1_117-VS-T30_2_115	CK30-VS-T30@Ratio@set,CK30_2_119-VS-T30_1_114	CK30-VS-T30@QuantNumber@set,CK30_1_117-VS-T30_2_115	CK30-VS-T30@QuantNumber@set,CK30_2_119-VS-T30_1_114	CK30-VS-T30@Sig@set,CK30_1_117-VS-T30_2_115	CK30-VS-T30@Sig@set,CK30_2_119-VS-T30_1_114	CK30-VS-T30@Mean	CK30-VS-T30@SD	Accession	NCBInr Identity	NCBInr E_Value	NCBInr Accession	NCBInr Description	Uniprot_Swissprot Identity	Uniprot_Swissprot E_Value	Uniprot_Swissprot Accession	Uniprot_Swissprot Description	Uniprot_Tremble Identity	Uniprot_Tremble E_Value	Uniprot_Tremble Accession	Uniprot_Tremble Description	Protein_or_Domain	COG Identity	COG E-Value	COG_ID	COG Function-Description	COG Code	COG Functional-Categories	KEGG(ko_id|rank|evalue|score|identity|ko_definition)	GO Biological_Process	GO Molecular_Function	GO Cellular_Component
1	gi|425776023|gb|EKV14261.1|	Endosomal cargo receptor (Erv25), putative [Penicillium digitatum Pd1]	28373	MGTSPITLRGILGFFFVFVQLASALKFDLIATSGSGKNERCIRNFVSKDQLVVVTTIVGGTKADGQKVNIHIKDAMGNDHGRPKDVIGETRQIFTSPADTAFDVCFENQLIGHSTIQNPSRPIELDIEIGADARDWNSVQSQEKLKPVETDLRRIEEMVADVVTEMEYLRAREQRLRDTNESTNERVKWFAFGTMGMLVGLGAWQVVYLRAYFRSKHLI	110	11	-	6	6	2	2	1.575	1.202	6	6	*	-	1.3885	0.263751	gi|425776023|gb|EKV14261.1|	100	1e-126	gi|425768598|gb|EKV07116.1|	Endosomal cargo receptor (Erv25), putative [Penicillium digitatum PHI26] >gi|425776023|gb|EKV14261.1| Endosomal cargo receptor (Erv25), putative [Penicillium digitatum Pd1]	79.79	3e-89	sp|Q4WQL0|TMEDA_ASPFU	Endoplasmic reticulum vesicle protein 25 OS=Neosartorya fumigata (strain ATCC MYA-4609 / Af293 / CBS 101355 / FGSC A1100) GN=erv25 PE=3 SV=1	91.78	3e-119	B6HRA5	B6HRA5_PENCW Pc22g03160 protein (Precursor) OS=Penicillium chrysogenum (strain ATCC 28089 / DSM 1075 / Wisconsin 54-1255) GN=Pc22g03160 PE=3 SV=1	-	-	-	-	-	-	-	-	GO:0006888//ER to Golgi vesicle-mediated transport;GO:0015031//protein transport	-	GO:0000139//Golgi membrane;GO:0005789//endoplasmic reticulum membrane;GO:0030134//ER to Golgi transport vesicle;GO:0016021//integral to membrane
2	gi|425782406|gb|EKV20316.1|	hypothetical protein PDIP_17480 [Penicillium digitatum Pd1]	13486	MSSQILRKLQGGNLEVFKFGMYVLFPIGWMYYFGTNLDNRFSTKGFWPTAEQSHKIPLDKEEIDQELTRMRMVDAMKREQRQAAETQAQIQATPSQQ	57	25.8	-	3	3	2	2	1.583	1.882	3	3	-	*	1.7325	0.211425	gi|425782406|gb|EKV20316.1|	100	1e-41	gi|425773904|gb|EKV12229.1|	hypothetical protein PDIG_45540 [Penicillium digitatum PHI26] >gi|425782406|gb|EKV20316.1| hypothetical protein PDIP_17480 [Penicillium digitatum Pd1]	40	2e-08	sp|P38958|PT100_YEAST	Protein PET100, mitochondrial OS=Saccharomyces cerevisiae (strain ATCC 204508 / S288c) GN=PET100 PE=1 SV=1	92	5e-35	B6HDN2	B6HDN2_PENCW Pc20g12460 protein OS=Penicillium chrysogenum (strain ATCC 28089 / DSM 1075 / Wisconsin 54-1255) GN=Pc20g12460 PE=4 SV=1	-	-	-	-	-	-	-	-	-	-
3	gi|425772154|gb|EKV10568.1|	hypothetical protein PDIP_59490 [Penicillium digitatum Pd1]	101145	MTSDQLSDHSPKNLSDSWATLSVSDIRSEDGSHSEQTDIGSLIDQAGPDDVASLDERYSGSEAEAQDEDNQDDDGIDREEVQCTESVSQELPALFAARRTTIDDSTTTTKPSFPHSNDSIEFVEPERWPEVERVELKHTIRTFEGAAASELKSRLPYNSTDSIIMATVQQTMTKQSLDLDKPFRVLYVGHPGFRNIILDKIGDVLVSSSCAGSETSSAESSRYHVVPTSFGAGAVPNFAELLPIHVQLVVDECLEATTDPHADRPNTLSLKFKNRPICISAWTGSGYHVTSATDWTLPDVAILFVSSLDDAVAVNTQRLAHMFLERHGVPAMMISEEPLWKMAGEVIPLNHNSLHTCLESRHPVSGETAVLRRYPIDLKTFESITPGQLNRNLASLVSL…	43	3.2	-	2	2	2	2	1.561	1.05	2	2	*	-	1.3055	0.361332	gi|425772154|gb|EKV10568.1|	100	0	gi|425772154|gb|EKV10568.1|	hypothetical protein PDIP_59490 [Penicillium digitatum Pd1]	-	-	-	-	87.25	0	B6HKF9	B6HKF9_PENCW Pc21g07330 protein OS=Penicillium chrysogenum (strain ATCC 28089 / DSM 1075 / Wisconsin 54-1255) GN=Pc21g07330 PE=4 SV=1	-	-	-	-	-	-	-	-	-	-
4	gi|425779472|gb|EKV17524.1|	60S ribosomal protein L35 [Penicillium digitatum Pd1]	20045	MSSKVKAGQLWGKNKDELATQLEELKLELNQLRVQKISSGASSKTQRIGEVRKSIARVLTVINANQRAQLRLFYKNKKYLPLDLRPKLTREIRRRLTKHERTQTTDKLRKRAIHFPQRKYAVKV	285	42.7	-	29	29	7	7	1.755	1.369	28	28	*	*	1.562	0.272943	gi|425779472|gb|EKV17524.1|	100	5e-60	gi|425779216|gb|EKV17293.1|	60S ribosomal protein L35 [Penicillium digitatum PHI26] >gi|425779472|gb|EKV17524.1| 60S ribosomal protein L35 [Penicillium digitatum Pd1]	65.85	6e-36	sp|Q8L805|RL35_WHEAT	60S ribosomal protein L35 OS=Triticum aestivum GN=RPL35 PE=1 SV=1	99.19	1e-58	B6H873	B6H873_PENCW Pc16g04120 protein OS=Penicillium chrysogenum (strain ATCC 28089 / DSM 1075 / Wisconsin 54-1255) GN=Pc16g04120 PE=3 SV=1	YDL191w	115	2e-26	COG0255	Ribosomal protein L29	J	Translation, ribosomal structure and biogenesis ;	K02918|1|1e-60|229|pcs:Pc16g04120|large subunit ribosomal protein L35e	GO:0006412//translation	GO:0003735//structural constituent of ribosome	GO:0005840//ribosome
5	gi|425782050|gb|EKV19981.1|	hypothetical protein PDIP_21380 [Penicillium digitatum Pd1]	22597	MASANTKATAPHRHLNFSSFHVPTTPCQTAIMSSQKQIDPKKQQELQHQYTNFKNTLQQLAQKIGDIEQEAEEHKLVIETLDPLPADRKCFRVVNGVLVERTVKDVLPTLKTNSDGLKQVLEDMLKQYKSKQGELDNWKKKNNIQVVQP	77	28.2	-	5	5	4	4	1.115	1.84	4	3	-	*	1.4775	0.512652	gi|425782050|gb|EKV19981.1|	100	2e-83	gi|425782050|gb|EKV19981.1|	hypothetical protein PDIP_21380 [Penicillium digitatum Pd1]	49.54	3e-26	sp|Q9UTC9|PFD2_SCHPO	Probable prefoldin subunit 2 OS=Schizosaccharomyces pombe (strain 972 / ATCC 24843) GN=SPAC227.10 PE=2 SV=1	90.68	7e-55	C8V5N1	C8V5N1_EMENI Prefoldin subunit 2, putative (AFU_orthologue; AFUA_1G03830) OS=Emericella nidulans (strain FGSC A4 / ATCC 38163 / CBS 112.46 / NRRL 194 / M139) GN=ANIA_04033 PE=4 SV=1	-	-	-	-	-	-	-	K09549|1|7e-56|214|aor:AOR_1_1714154|prefoldin subunit 2	GO:0006457//protein folding	GO:0051082//unfolded protein binding	GO:0016272//prefoldin complex
6	gi|425778696|gb|EKV16803.1|	hypothetical protein PDIP_33910 [Penicillium digitatum Pd1]	37289	MYRNAAARSALRAFSSSNASVARSALGNQICKAQMTSSARNLLRPSVSPSFALAAHKPVTTALVRYSSSTAKHDEDDIDIMAGMKSEAKVIKETFSLAGVPKEALYLGMAGVVPYLATSLQTVFLSYEINRAAALGDGLIFSGQSAELMLHMIEPVQIGYGAVILSFLGAVHWGLEWAGYGGKFGYRRYAAGVIAPAVAWPTLLFPVEYALISQFLAFTFLYYNDARAAATGRAPHWYGMYRFVLTFVVGASIVATLIGRGQIQQTITSEHSIKDKINALIFLQKKEKEEADARRRSEIEESE	303	10.6	-	15	15	3	3	1.484	1.713	15	15	-	*	1.5985	0.161927	gi|425778696|gb|EKV16803.1|	100	1e-164	gi|425766074|gb|EKV04704.1|	hypothetical protein PDIG_87890 [Penicillium digitatum PHI26] >gi|425778696|gb|EKV16803.1| hypothetical protein PDIP_33910 [Penicillium digitatum Pd1]	-	-	-	-	94.35	1e-152	B6HVJ6	B6HVJ6_PENCW Pc22g06080 protein OS=Penicillium chrysogenum (strain ATCC 28089 / DSM 1075 / Wisconsin 54-1255) GN=Pc22g06080 PE=4 SV=1	-	-	-	-	-	-	-	-	-	-
7	gi|425779791|gb|EKV17822.1|	hypothetical protein PDIP_29540 [Penicillium digitatum Pd1]	101066	MSADEAGDTTPTSTTNGEPHPDPATNANSGKRKRSTQDDKSSTEPNATASRDRANLHETLRSLIDLLLKHDTELQLLSCPFPNSTAKPRTKRAKIFGDLETSNIQTRVNSGKYNTLQEFLSDIERASAAVIERNQAQANSTKEDGAPLNEVVNRIAAFKKHMNSLIGQSFVNQPEVKTETMEDDTDESTELHAINVCQREDKPALTLFGNPSNPKQLFSSLQKSVKVPLQSESGPEKFVEVQEELREVALPNGITATKVIPFNLDAASQPKRTFGEVFAPRETLPKLEPPRKRSHRANSSTWTDRFDATFDVRTFLGERSNYCLAPLPSIQWLQYGGVTSSPSYWDRVEKYADSDNVHRHGDPALWTGPDSSAFQGVFSSFAPSYDSSGAIVQLASKDM…	51	1	-	2	2	1	1	1.377	2.346	2	2	*	*	1.8615	0.685186	gi|425779791|gb|EKV17822.1|	100	0	gi|425767348|gb|EKV05922.1|	hypothetical protein PDIG_81190 [Penicillium digitatum PHI26] >gi|425779791|gb|EKV17822.1| hypothetical protein PDIP_29540 [Penicillium digitatum Pd1]	-	-	-	-	90.51	0	B6H4N0	B6H4N0_PENCW Pc13g09790 protein OS=Penicillium chrysogenum (strain ATCC 28089 / DSM 1075 / Wisconsin 54-1255) GN=Pc13g09790 PE=4 SV=1	-	-	-	-	-	-	-	-	-	-
8	gi|425771150|gb|EKV09603.1|	hypothetical protein PDIP_64010 [Penicillium digitatum Pd1]	10452	MFAPTARRAVAQASAYAPKYYIPRTAAGMTLGTAVQLGSIAAGFGVALGSGALFIFGEVPRVRNDILRKLPFFDTYYDRRIAPEDNPF	45	12.5	-	3	3	1	1	2.507	2.168	3	3	*	*	2.3375	0.239709	gi|425771150|gb|EKV09603.1|	100	5e-34	gi|425771150|gb|EKV09603.1|	hypothetical protein PDIP_64010 [Penicillium digitatum Pd1] >gi|425776674|gb|EKV14882.1| hypothetical protein PDIG_29610 [Penicillium digitatum PHI26]	-	-	-	-	91.3	9e-29	B6HRM2	B6HRM2_PENCW Pc22g20870 protein (Precursor) OS=Penicillium chrysogenum (strain ATCC 28089 / DSM 1075 / Wisconsin 54-1255) GN=Pc22g20870 PE=4 SV=1	-	-	-	-	-	-	-	K00420|1|7e-07|51.2|yli:YALI0C12210g|ubiquinol-cytochrome c reductase subunit 10	-	-
9	gi|425774913|gb|EKV13204.1|	Exopolyphosphatase, putative [Penicillium digitatum Pd1]	59037	MTLLQFLRQARQVHLQFLSGALPEPPIYVIGNPSADLDSIVSAIIYSYCANNRLPIKSPRPHIPLLNLPNFPAGTELYRLRPEFSAALWSSTNFPALKSEEQFENTLQSAGSFLRQHVMTVADFAQSLQDQHVWKQILADATLVDWNAFSRCSADKGSGSLTGLPGVSFRTVGCIDHHVDENFMPSVDEIPEGQPMIIQPGPGSCASLITRELQQRKLWDTTPEMLQVAKLALSAVLIDTSNLTAEGKVTDVDRMAVELLQYQIEGESQAAANAKGDWEIEAFYKSILHAKQNSLDLLSLDEILDRDYKDWTETSQSSGKTVKTGFCSVVKPMRWIVQKAGGPEKFLDDVRLFAASAEKELDVLVIMTAFTGTNDKFCRELFVRVTGDNESAAKGVKRF…	62	6.9	-	2	2	2	2	1.238	1.547	2	2	-	*	1.3925	0.218496	gi|425774913|gb|EKV13204.1|	100	0	gi|425772481|gb|EKV10882.1|	Exopolyphosphatase, putative [Penicillium digitatum PHI26] >gi|425774913|gb|EKV13204.1| Exopolyphosphatase, putative [Penicillium digitatum Pd1]	28.09	2e-20	sp|P38698|PPX1_YEAST	Exopolyphosphatase OS=Saccharomyces cerevisiae (strain ATCC 204508 / S288c) GN=PPX1 PE=1 SV=1	87.77	0	B6HKJ8	B6HKJ8_PENCW Pc21g15970 protein OS=Penicillium chrysogenum (strain ATCC 28089 / DSM 1075 / Wisconsin 54-1255) GN=Pc21g15970 PE=4 SV=1	SPAC2F3.11	114	5e-25	COG1227	Inorganic pyrophosphatase/exopolyphosphatase	C	Energy production and conversion ;	K01514|1|0.0|822|pcs:Pc21g15970|exopolyphosphatase [EC:3.6.1.11]	-	GO:0016462//pyrophosphatase activity	GO:0005737//cytoplasm
10	gi|425768968|gb|EKV07478.1|	hypothetical protein PDIP_73550 [Penicillium digitatum Pd1]	29824	MIDQRIFENLQTKIDEETTVRDAILSRAHSTPAGQLKPVLDDVTKEILAQKEEVARLKAVADQHPFYKYNGLWTRELQNLVASIELCAWLGGLQEHKGPSSTSFMTIEDVGKFLDIPFNLKEQDAFHLTIEEYLLAVITMVEELARLAVNSVTLGDYTRPMQIGNFVKEVFAGFQLLNLKNDILRKRSDGIKYSVKKVEDVVYDLSLRNLVPKAGSSA	136	17	-	7	7	3	3	2.002	2.084	6	7	*	*	2.043	0.0579828	gi|425768968|gb|EKV07478.1|	100	2e-125	gi|425768968|gb|EKV07478.1|	hypothetical protein PDIP_73550 [Penicillium digitatum Pd1] >gi|425770552|gb|EKV09021.1| hypothetical protein PDIG_64210 [Penicillium digitatum PHI26]	45.78	5e-31	sp|P79769|TSN_CHICK	Translin OS=Gallus gallus GN=TSN PE=1 SV=1	88.94	3e-116	B6HCJ8	B6HCJ8_PENCW Pc18g01770 protein OS=Penicillium chrysogenum (strain ATCC 28089 / DSM 1075 / Wisconsin 54-1255) GN=Pc18g01770 PE=4 SV=1	-	-	-	-	-	-	-	-	-	GO:0043565//sequence-specific DNA binding	-
11	gi|425779920|gb|EKV17947.1|	Rho GTPase Rho 2, putative [Penicillium digitatum Pd1]	26854	MSQQQDDNVMRRKLVIIGDGACGKTSLLSVFTLGYFPTHYVPTVFENYVTDCRVDGRSVQLALWDTAGQEDYERLRPLAYSKAHVLLIGFSIDTPDSLENVKHKWIDEANERCPDVPILLVGLKKDLREDPLAIEEMRKKSLRFVTTKEGSDIATSIGARKYLECSSLTGEGVDDVFEAATRAALLTFDKRKSSCCVVI	101	23.6	-	5	5	4	4	1.591	1.26	4	5	*	-	1.4255	0.234052	gi|425779920|gb|EKV17947.1|	100	6e-114	gi|425767315|gb|EKV05889.1|	Rho GTPase Rho 2, putative [Penicillium digitatum PHI26] >gi|425779920|gb|EKV17947.1| Rho GTPase Rho 2, putative [Penicillium digitatum Pd1]	69.95	2e-81	sp|Q10133|RHO2_SCHPO	GTP-binding protein rho2 OS=Schizosaccharomyces pombe (strain 972 / ATCC 24843) GN=rho2 PE=1 SV=1	95.48	2e-106	B6H4Q8	B6H4Q8_PENCW Pc13g10080 protein OS=Penicillium chrysogenum (strain ATCC 28089 / DSM 1075 / Wisconsin 54-1255) GN=Pc13g10080 PE=3 SV=1	SPAC16.01	301	4e-82	COG1100	GTPase SAR1 and related small G proteins	R	General function prediction only ;	K07975|1|3e-110|396|afv:AFLA_032370|Rho family, other	GO:0007264//small GTPase mediated signal transduction;GO:0055114//oxidation-reduction process	GO:0005525//GTP binding;GO:0047824//D-iditol 2-dehydrogenase activity	GO:0005622//intracellular;GO:0016020//membrane
12	gi|425772234|gb|EKV10645.1|	hypothetical protein PDIP_59200 [Penicillium digitatum Pd1]	13479	MTYTAIVMYPNEADIKFDESYYIKTHMPLAESIWKSHGLIGWRVNKFPTALNGSPSQYLIMATLEWESQESLQAAMQSPGTAKVFADVPNFTNSRLFNACYQ	133	26.5	-	10	10	3	3	1.373	1.567	10	10	*	*	1.47	0.137179	gi|425772234|gb|EKV10645.1|	100	1e-55	gi|425772234|gb|EKV10645.1|	hypothetical protein PDIP_59200 [Penicillium digitatum Pd1] >gi|425777413|gb|EKV15587.1| hypothetical protein PDIG_24720 [Penicillium digitatum PHI26]	-	-	-	-	69.89	2e-34	B6HL64	B6HL64_PENCW Pc21g07700 protein OS=Penicillium chrysogenum (strain ATCC 28089 / DSM 1075 / Wisconsin 54-1255) GN=Pc21g07700 PE=4 SV=1	-	-	-	-	-	-	-	-	-	-
13	gi|425771844|gb|EKV10277.1|	hypothetical protein PDIP_61230 [Penicillium digitatum Pd1]	13514	MASQGVNVLRYSALVAGLVYGVYHQSSLNSVTKRAEIEHEYARKERLIEQAKAEYRKKTQPQQETKTQTSGLITNFEDPKFDLEAFLKAKAE	170	34.8	-	9	9	3	3	1.338	1.584	9	9	*	*	1.461	0.173948	gi|425771844|gb|EKV10277.1|	100	2e-38	gi|425771844|gb|EKV10277.1|	hypothetical protein PDIP_61230 [Penicillium digitatum Pd1] >gi|425777191|gb|EKV15375.1| hypothetical protein PDIG_26780 [Penicillium digitatum PHI26]	-	-	-	-	93.41	4e-35	B6HNL7	B6HNL7_PENCW Pc21g05220 protein OS=Penicillium chrysogenum (strain ATCC 28089 / DSM 1075 / Wisconsin 54-1255) GN=Pc21g05220 PE=4 SV=1	-	-	-	-	-	-	-	-	GO:0015986//ATP synthesis coupled proton transport	GO:0015078//hydrogen ion transmembrane transporter activity	GO:0000276//mitochondrial proton-transporting ATP synthase complex, coupling factor F(o)
14	gi|425768826|gb|EKV07338.1|	Glutathione S-transferase [Penicillium digitatum Pd1]	32026	MSSNITLYTWPTPNGIKASITLEELGLPYKTEGLDISSSANPQKEEWFLKINPNGRIPALLDGSQRVFESGAIMTYLVDKYDTDRKISYAPGTPEHVEQTSWLMFQMGGLGPMQGQANHFRLFANKRSDYAIKRYVDETKRLYSVLESRLKESPYLAGEKYTIADIASFAWVRGARVFLDIDLSEFPVLQRWVEEIDKRAAVQKGVDVPHSTRTPEQKAEFFRNCRAKIDAMTNSDQH	213	29.4	-	8	8	5	5	1.357	1.53	8	8	-	*	1.4435	0.122329	gi|425768826|gb|EKV07338.1|	100	4e-140	gi|425768826|gb|EKV07338.1|	Glutathione S-transferase [Penicillium digitatum Pd1] >gi|425770159|gb|EKV08632.1| Glutathione S-transferase [Penicillium digitatum PHI26]	43.06	2e-35	sp|P77526|YFCG_ECOLI	Probable disulfide bond reductase yfcG OS=Escherichia coli (strain K12) GN=yfcG PE=1 SV=1	87.82	3e-124	B6HCA3	B6HCA3_PENCW Pc18g01320 protein OS=Penicillium chrysogenum (strain ATCC 28089 / DSM 1075 / Wisconsin 54-1255) GN=Pc18g01320 PE=3 SV=1	VCA0584	173	2e-43	COG0625	Glutathione S-transferase	O	Posttranslational modification, protein turnover, chaperones ;	K00799|1|1e-61|234|fgr:FG02000.1|glutathione S-transferase [EC:2.5.1.18]	-	GO:0004364//glutathione transferase activity	-
15	gi|425771913|gb|EKV10342.1|	Thioredoxin [Penicillium digitatum Pd1]	14050	MGVTAITSAEEYKTKVTEATGPVVVDFHAVWCGPCKAIAPTLEKLSEAHTDVQFYKVDVDDLAEVAAANGVSAMPTFHFYNGGERKQEVKGANPPAIQAGLKAILA	780	61.3	-	33	33	5	5	1.619	1.293	32	32	*	*	1.456	0.230517	gi|425771913|gb|EKV10342.1|	100	1e-48	gi|425771913|gb|EKV10342.1|	Thioredoxin [Penicillium digitatum Pd1] >gi|425777308|gb|EKV15489.1| Thioredoxin [Penicillium digitatum PHI26]	81.9	1e-39	sp|P34723|THIO_PENCH	Thioredoxin OS=Penicillium chrysogenum GN=TRXA PE=1 SV=1	84.69	2e-36	B6HIG8	B6HIG8_PENCW Thioredoxin OS=Penicillium chrysogenum (strain ATCC 28089 / DSM 1075 / Wisconsin 54-1255) GN=Pc21g06110 PE=3 SV=1	SPAC7D4.07c	108	2e-24	COG0526	Thiol-disulfide isomerase and thioredoxins	OC	Posttranslational modification, protein turnover, chaperones ; Energy production and conversion ;	K03671|1|2e-38|155|pcs:Pc21g06110|thioredoxin 1	GO:0008152//metabolic process;GO:0009987//cellular process	-	-
16	gi|425783374|gb|EKV21228.1|	60S ribosomal protein L35Ae [Penicillium digitatum Pd1]	15988	MPSEQGHRLYVKGRHLSFQRSKHNLTPNTSLVKIEGVDDTKSAKFYLGKKVAFVYRAKREVRGSNIRVIWGKVTRPHGNSGVVRAKFRNNLPPKSLGATVRVMLYPSNI	78	22.9	-	8	8	3	3	1.524	1.327	5	5	*	*	1.4255	0.1393	gi|425783374|gb|EKV21228.1|	100	9e-58	gi|425781293|gb|EKV19269.1|	60S ribosomal protein L35Ae [Penicillium digitatum PHI26] >gi|425783374|gb|EKV21228.1| 60S ribosomal protein L35Ae [Penicillium digitatum Pd1]	70.48	4e-39	sp|P41056|RL33B_YEAST	60S ribosomal protein L33-B OS=Saccharomyces cerevisiae (strain ATCC 204508 / S288c) GN=RPL33B PE=1 SV=2	97.25	6e-55	B6HG22	B6HG22_PENCW Pc20g03340 protein OS=Penicillium chrysogenum (strain ATCC 28089 / DSM 1075 / Wisconsin 54-1255) GN=Pc20g03340 PE=4 SV=1	YOR234c	159	8e-40	COG2451	Ribosomal protein L35AE/L33A	J	Translation, ribosomal structure and biogenesis ;	K02917|1|5e-57|217|pcs:Pc20g03340|large subunit ribosomal protein L35Ae	GO:0006412//translation	GO:0003735//structural constituent of ribosome	GO:0005840//ribosome
17	gi|425779287|gb|EKV17355.1|	Peroxin 7 [Penicillium digitatum Pd1]	41540	MLHYRTQGFNGCAVKYSPFFDNRLAVASSSNFGLVGNGRLHVLELTANGIQPLKWFTTQDSLYDLAWSELHENQVLAASGDGSIKLFDCAANDFPISNWKEHAREVFSVSWNPVTKDRFCSSSWDGTVRIWSPHRLQSLLTLPTHSCTYSASFCPHSPDIISCVTSDSYVRVFDLRTPASASNHLVTQIPIHAGSPAPAIPGHPGGPSPPAEALTHDWNKYRPTVLATAGVDRAIRTFDIRAPQQGPLATMLGHEYAVRKLAWSPHLSNVLLSASYDMTCRVWSDRSDTGPGGDMDMMRAGPVVGAELGRMGRHTEFVTGVDWCLFGSEGWCASVGWDENLYVWDVRATMS	73	11.7	-	3	3	3	3	1.57	1.105	3	3	*	-	1.3375	0.328805	gi|425779287|gb|EKV17355.1|	100	0	gi|425765979|gb|EKV04618.1|	Peroxin 7 [Penicillium digitatum PHI26] >gi|425779287|gb|EKV17355.1| Peroxin 7 [Penicillium digitatum Pd1]	43.15	1e-83	sp|P39108|PEX7_YEAST	Peroxisomal targeting signal 2 receptor OS=Saccharomyces cerevisiae (strain ATCC 204508 / S288c) GN=PEX7 PE=1 SV=1	96.3	0	A4GFM1	A4GFM1_PENCH Peroxin 7 OS=Penicillium chrysogenum GN=PEX7 PE=4 SV=1	all0478	60.5	4e-09	COG2319	FOG: WD40 repeat	R	General function prediction only ;	K13341|1|0.0|654|pcs:Pc06g01630|peroxin-7	GO:0016558//protein import into peroxisome matrix	GO:0005053//peroxisome matrix targeting signal-2 binding	GO:0005777//peroxisome
18	gi|425782445|gb|EKV20354.1|	Signal sequence receptor alpha subunit, putative [Penicillium digitatum Pd1]	85394	MLETFEILTTSGVVLWSKAYAPVGAHVINSLINDVFIEEKVVPQNVTADGISPAFKKEKYTLKWKRVKEFDLIFVAVYQSLLHLGWIDKLLENISTIFIDLYKDQVKGNRVRIQTYRFDQYFEQQVRELEDNTGGFVEEHVPEMGDKKDPLVSSDNGGPPPPPVPGLVKAQPRAALAGATSDEGTPPGTPEISRSSTPQGHLLTAKAGPGGRGSRRSRKAANSSANASSGDEVRKGKPAKTPVKKMRRWDASGMADEDDGEILDYSAPAEEGEAAAPAVEAVSEDDWGRRTGKGQFVLKELGEEVQSILDQADAEKSKATVSSGVVGSGFNAIGGFFRNIVGGKVLTESDLEKPLKAMEEHLLKKNVAREAAVRLCEGVKREMIGKKTGNFQSTDAALH…	125	9.1	-	5	5	4	4	1.032	1.728	4	3	-	*	1.38	0.492146	gi|425782445|gb|EKV20354.1|	100	0	gi|425773869|gb|EKV12194.1|	Signal sequence receptor alpha subunit, putative [Penicillium digitatum PHI26] >gi|425782445|gb|EKV20354.1| Signal sequence receptor alpha subunit, putative [Penicillium digitatum Pd1]	56.31	1e-87	sp|O43032|SRPR_SCHPO	Signal recognition particle receptor subunit alpha homolog OS=Schizosaccharomyces pombe (strain 972 / ATCC 24843) GN=srp101 PE=2 SV=1	95.98	0	B6HGW3	B6HGW3_PENCW Pc20g13240 protein OS=Penicillium chrysogenum (strain ATCC 28089 / DSM 1075 / Wisconsin 54-1255) GN=Pc20g13240 PE=4 SV=1	YDR292c	374	3e-103	COG0552	Signal recognition particle GTPase	U	Intracellular trafficking, secretion, and vesicular transport ;	K13431|1|0.0|1125|pcs:Pc20g13240|signal recognition particle receptor subunit alpha	GO:0006184//GTP catabolic process;GO:0006614//SRP-dependent cotranslational protein targeting to membrane	GO:0003924//GTPase activity;GO:0005525//GTP binding;GO:0005047//signal recognition particle binding	GO:0005785//signal recognition particle receptor complex
19	gi|425768566|gb|EKV07085.1|	hypothetical protein PDIP_75140 [Penicillium digitatum Pd1]	95865	MEETIAELRRQLEEERQAREEAERRQGEAELRVQPNTLLRLLDRCHNSLSQAIRVETDATLTTQGDATDPVNRLYPKRIVPWLDFPQLQEQVWRKFDRTTTFSSRPLFPSDTQIDYVVTNIQNRPIYSEASLRNFERDTVDNFVEMVIKALREDEAFRHEFGIQGQVTFYDRANPSETSLKNSLERMNLQDMRTPQRLANTRPGRGRGMGRGAAQGKKRDGTARRRNRRADQFCVHLVADERQIPVYAVEFKAPHKVTIPELVAGLHQMDPARDVINQEGDTFEFYATCLVAAVITQIFSYMIDSGVQYGYICTGEAFVFLHIPEDDPTVVQYFMCIPNQDVQADDELRLHRTAIGQVLAFTLQALAAEAPSQEWHDAAHDTLKTWEVEYLDVLRKIPE…	114	1.6	-	2	2	1	1	2.065	1.88	2	2	*	-	1.9725	0.130815	gi|425768566|gb|EKV07085.1|	100	0	gi|425768566|gb|EKV07085.1|	hypothetical protein PDIP_75140 [Penicillium digitatum Pd1] >gi|425770245|gb|EKV08718.1| hypothetical protein PDIG_65820 [Penicillium digitatum PHI26]	-	-	-	-	92.91	1e-63	B6HWA6	B6HWA6_PENCW Pc23g00560 protein OS=Penicillium chrysogenum (strain ATCC 28089 / DSM 1075 / Wisconsin 54-1255) GN=Pc23g00560 PE=4 SV=1	-	-	-	-	-	-	-	-	GO:0008152//metabolic process	GO:0016772//transferase activity, transferring phosphorus-containing groups	-
20	gi|425772081|gb|EKV10506.1|	hypothetical protein PDIP_60080 [Penicillium digitatum Pd1]	119635	MGSNGRNTKIPLVPLPKGSVLLPGVTLRIPVSNRPDLANLLSSLADKPLKRDTNAVTFGCVPLKSPSLSQDGKQLLEGDNMDSEQKEEYDLIDAGQARKEDLFHCGTIGKVIGVQRRIYSEPFLLVQGSQRFSVKKVLRDRPYFEAEVFINDESNSGQGDAEFAELFQQLRQLSRELLTLLRFSSLLSAASSRLSPLVARKFELYISRTELTQAGKLADFMADVSDASFEEKLRILNSLDVRERLERVVEILTRQIQHIKSSVRVTSLGSTSFPSSVMEISQIDPREREILAKRAISGLSGMTPPGGRGNEEEKEPNEVEELHQKLNDAQLSPEARKVADKELKRLQKMNPANAEYGVCRTYLENLSEIPWTKVTEDQLGPDTLKKARKQLDEDHYGLE…	225	5.6	-	7	7	4	4	1.78	1.719	7	7	-	*	1.7495	0.0431335	gi|425772081|gb|EKV10506.1|	100	0	gi|425772081|gb|EKV10506.1|	hypothetical protein PDIP_60080 [Penicillium digitatum Pd1] >gi|425777258|gb|EKV15439.1| hypothetical protein PDIG_25600 [Penicillium digitatum PHI26]	78.54	0	sp|A2RAF6|LONP2_ASPNC	Lon protease homolog 2, peroxisomal OS=Aspergillus niger (strain CBS 513.88 / FGSC A1513) GN=An18g02980 PE=3 SV=1	92.11	0	B6HJQ3	B6HJQ3_PENCW Lon protease homolog OS=Penicillium chrysogenum (strain ATCC 28089 / DSM 1075 / Wisconsin 54-1255) GN=Pc21g06860 PE=3 SV=1	BH3050	546	4e-155	COG0466	ATP-dependent Lon protease, bacterial type	O	Posttranslational modification, protein turnover, chaperones ;	K01338|1|0.0|1602|pcs:Pc21g06860|ATP-dependent Lon protease [EC:3.4.21.53]	GO:0006508//proteolysis	GO:0004252//serine-type endopeptidase activity;GO:0005524//ATP binding;GO:0004176//ATP-dependent peptidase activity	GO:0005782//peroxisomal matrix
21	gi|425772215|gb|EKV10626.1|	Kinesin family protein [Penicillium digitatum Pd1]	223852	MSSRQGGSRASDEDGKTAVKVAVRVRPPLKPTDPGYELIPQRFQKSTVQVTAPTSLAVDVSAGRKLFVFDRVFPETTEQEGIWEYVSDSVDSFVEGYNVSIMAYGQSGAGKSFTMGTSGPIGQHNMHDMGIIPRAAQVLFDKLDGPSKHNRNSSHSNSGLRTPQRYSLSSAANFGKLNQEKEKTWQLKATYVEIYNEHLRDLLLPESTIANDRSNVTIREDTKGRIILTGLHQVNVNSFEDLIGALNFGSTIRQTDSTAINAKSSRSHAVFSLNLVQRKSSSNHATPSPMKEKRMSIPSDTFHAGESVTVDSKLHFVDLAGSERLKNTGASGERAREGISINAGLAALGKVISQLSSRQQGSHVSYRDSKLTRLLQDSLGGNAYTYMIACVTPAEFHLS…	178	4.3	-	5	5	5	5	1.085	1.571	5	5	-	*	1.328	0.343654	gi|425772215|gb|EKV10626.1|	100	0	gi|425772215|gb|EKV10626.1|	Kinesin family protein [Penicillium digitatum Pd1] >gi|425777492|gb|EKV15664.1| Kinesin family protein [Penicillium digitatum PHI26]	57.76	4e-32	sp|Q6S003|KIF8_DICDI	Kinesin-related protein 8 OS=Dictyostelium discoideum GN=kif8 PE=2 SV=1	86.11	0	B6HLJ3	B6HLJ3_PENCW Pc21g07990 protein OS=Penicillium chrysogenum (strain ATCC 28089 / DSM 1075 / Wisconsin 54-1255) GN=Pc21g07990 PE=3 SV=1	ECU05g0060_1	209	4e-53	COG5059	Kinesin-like protein	Z	Cytoskeleton ;	K10395|1|4e-73|276|mpr:MPER_12592|kinesin family member 4/7/21/27!K10398|4|1e-51|205|cnb:CNBG3440|kinesin family member 11	GO:0007018//microtubule-based movement	GO:0005524//ATP binding;GO:0003777//microtubule motor activity	GO:0005874//microtubule
22	gi|425773767|gb|EKV12100.1|	Succinate dehydrogenase cytochrome b560 subunit [Penicillium digitatum Pd1]	22737	MFSQKVVQQSMRRLAVQQPFAMRSSMMGASPVAVALGKNIQTRHQVTSAPNTEDPSQILVKQRLQRPVAPHLSIYKPQIGWIGSSLHRITGVALSGSLYLWATAYLVSPALGWHLESASMVAAMGALPLVAKVLLKTTLALPFTYHAMNGIRHLMWDLGRGLTNPVIIKTGWTVIGLSIASAVGLALI	74	9	-	7	7	2	2	2.074	2.426	7	7	*	*	2.25	0.248902	gi|425773767|gb|EKV12100.1|	100	2e-103	gi|425773767|gb|EKV12100.1|	Succinate dehydrogenase cytochrome b560 subunit [Penicillium digitatum Pd1] >gi|425775979|gb|EKV14218.1| Succinate dehydrogenase cytochrome b560 subunit [Penicillium digitatum PHI26]	42.74	4e-15	sp|P35720|C560_BOVIN	Succinate dehydrogenase cytochrome b560 subunit, mitochondrial OS=Bos taurus GN=SDHC PE=1 SV=2	93.62	2e-95	B6HUJ1	B6HUJ1_PENCW Pc22g14260 protein OS=Penicillium chrysogenum (strain ATCC 28089 / DSM 1075 / Wisconsin 54-1255) GN=Pc22g14260 PE=4 SV=1	SPCC330.12c	121	8e-28	COG2009	Succinate dehydrogenase/fumarate reductase, cytochrome b subunit	C	Energy production and conversion ;	K00236|1|3e-97|352|pcs:Pc22g14260|succinate dehydrogenase (ubiquinone) cytochrome b560 subunit	GO:0006099//tricarboxylic acid cycle	GO:0000104//succinate dehydrogenase activity;GO:0009055//electron carrier activity	GO:0045281//succinate dehydrogenase complex
23	gi|425770497|gb|EKV08967.1|	Small nuclear ribonucleoprotein (LSM7), putative [Penicillium digitatum Pd1]	16506	MSERGSFRGGRGRGGRGGQGQQKSGGGGGAQEKPKKENILDLSKYMDKEVQVKFNGGREVIGTLKGYDQLMNLVLDDVKETMRDEEGNTTTRSMGLIVARGTLIVLISPADGSEEIPNPFLQAEE	236	23.2	-	9	9	3	3	1.313	1.511	8	8	-	*	1.412	0.140007	gi|425770497|gb|EKV08967.1|	100	2e-49	gi|425770497|gb|EKV08967.1|	Small nuclear ribonucleoprotein (LSM7), putative [Penicillium digitatum Pd1] >gi|425771863|gb|EKV10295.1| Small nuclear ribonucleoprotein (LSM7), putative [Penicillium digitatum PHI26]	61.46	2e-29	sp|O74499|LSM7_SCHPO	U6 snRNA-associated Sm-like protein LSm7 OS=Schizosaccharomyces pombe (strain 972 / ATCC 24843) GN=lsm7 PE=1 SV=1	95.83	4e-46	B6HAH5	B6HAH5_PENCW Pc16g12840 protein OS=Penicillium chrysogenum (strain ATCC 28089 / DSM 1075 / Wisconsin 54-1255) GN=Pc16g12840 PE=4 SV=1	AF0875	54.7	4e-08	COG1958	Small nuclear ribonucleoprotein (snRNP) homolog	K	Transcription ;	K12626|1|4e-48|188|pcs:Pc16g12840|U6 snRNA-associated Sm-like protein LSm7	GO:0000398//mRNA splicing, via spliceosome;GO:0030490//maturation of SSU-rRNA;GO:0000956//nuclear-transcribed mRNA catabolic process	GO:0003723//RNA binding	GO:0005730//nucleolus;GO:0005732//small nucleolar ribonucleoprotein complex;GO:0005688//U6 snRNP
24	gi|425781720|gb|EKV19667.1|	RNA processing factor 1 [Penicillium digitatum Pd1]	59365	MVVPGRSGPPPGVMGDMKTANKMRRKMNHVKRKRAKDAARREERYAFKKEEAKNPKLKEERLRRNIPLTLERKRVWDEADNDTEETGLGLSVDVERIKRAKKEEEDELNRPLEEGEDDSEAAESDNESVDSMLESDKSENEDEDEENDEDKTASLSRKKTSLRTATERATSPTQSTRSTNLSLAPEALAAKFPTLFTEGPPPTPKILITTGLNSTLHGQAETLTEVFPNSVYIRRNAHRYSHKFSIREISKFAANRNFTTVVVLNEDQKRPSGLTIVHLPVGPTFHFTISNWIEGKRLPGHGRATEHWPELILNNFRTPLGLLTAHLFRTLFPPQPEFEGRQVVTLHNQRDYIFVRRHRYVFREKRETEKAVVGADGKEMLGVEGIRTGLQELGPRFTL…	263	16	-	8	8	5	5	1.25	1.718	7	8	-	*	1.484	0.330926	gi|425781720|gb|EKV19667.1|	100	0	gi|425766567|gb|EKV05173.1|	RNA processing factor 1 [Penicillium digitatum PHI26] >gi|425781720|gb|EKV19667.1| RNA processing factor 1 [Penicillium digitatum Pd1]	44.59	2e-39	sp|Q7TND5|RPF1_MOUSE	Ribosome production factor 1 OS=Mus musculus GN=Rpf1 PE=2 SV=2	94.23	0	B6HGR6	B6HGR6_PENCW Pc20g01020 protein OS=Penicillium chrysogenum (strain ATCC 28089 / DSM 1075 / Wisconsin 54-1255) GN=Pc20g01020 PE=4 SV=1	YHR088w	214	3e-55	COG2136	Predicted exosome subunit/U3 small nucleolar ribonucleoprotein (snoRNP) component, contains IMP4 domain	JA	Translation, ribosomal structure and biogenesis ; RNA processing and modification ;	K14846|1|0.0|680|pcs:Pc20g01020|ribosome production factor 1	-	-
25	gi|425780211|gb|EKV18227.1|	Alfa-L-arabinofuranosidase [Penicillium digitatum Pd1]	56087	MFSRRRFERFCALVLSLAATGTLVEAGPCDIYASGNTPCIAAHSTTRALYDAYTGALYQVKRDSDGTTIDISPLSAGGVANAAAQDKFCSSTTCIITIIYDQSGSGNHLKQAPPGGFRGPEANGHDNLASAIGAPVTLNGQKAYGVFISPGTGYSNNAASGTATGDDAEGMYAVLDGTHYNGACCFDYGNAEVSSTDTGNGHMEAIYYGDSTAWGSGAGGGPWLMADLENGLFSGSSPTYNAGDPSLSDRFFTAIVKGGPNRWALRGGNAAAGSLSTYYSGARPNASGYNPMSKEGAIVLGIGGDNSHGAQGTFYEGVMTSGYPTDATENAVQANIVAARYATTPLTSGKALTVGSSISLRATTSGYTTRYIAHTGTTINTQVVSSSSATALQQQASWK…	34	5.1	-	2	2	2	2	1.91	1.532	2	2	-	*	1.721	0.267286	gi|425780211|gb|EKV18227.1|	100	0	gi|425767589|gb|EKV06158.1|	Alfa-L-arabinofuranosidase [Penicillium digitatum PHI26] >gi|425780211|gb|EKV18227.1| Alfa-L-arabinofuranosidase [Penicillium digitatum Pd1]	80.49	0	sp|Q92455|ABF1_HYPJE	Alpha-N-arabinofuranosidase OS=Hypocrea jecorina GN=abf1 PE=2 SV=1	88.51	0	B6HW29	B6HW29_PENCW Pc22g19620 protein (Precursor) OS=Penicillium chrysogenum (strain ATCC 28089 / DSM 1075 / Wisconsin 54-1255) GN=Pc22g19620 PE=4 SV=1	-	-	-	-	-	-	-	-	GO:0046373//L-arabinose metabolic process;GO:0031222//arabinan catabolic process;GO:0045493//xylan catabolic process	GO:0009044//xylan 1,4-beta-xylosidase activity;GO:0046556//alpha-N-arabinofuranosidase activity	GO:0005576//extracellular region
26	gi|425781891|gb|EKV19827.1|	Peptide alpha-N-acetyltransferase Nat2, putative [Penicillium digitatum Pd1]	32087	MSLRPTLLTKWISRRSEILKPPSLASYLHPSTRPSLARRSAIFSPVTQATQRSLTTTRCLTRTRPGPSSFQFKQRRFNSRSADGGKGSGTGTGAGASDKASLSQRLKKLSREYGWAALGVYLGLSALDFPFCFAAVRLLGVERIGYYEHAVIGFVKDKLKTLWPQTKGSEAEDGQGQLAQAEERNQEEASIWTQLVFAYAIHKSFIFIRVPLTAAVTPKVVKILRAWGWNIGKRKPKSL	153	15.9	-	3	3	3	3	1.065	1.576	3	3	-	*	1.3205	0.361332	gi|425781891|gb|EKV19827.1|	100	3e-110	gi|425766678|gb|EKV05279.1|	Peptide alpha-N-acetyltransferase Nat2, putative [Penicillium digitatum PHI26] >gi|425781891|gb|EKV19827.1| Peptide alpha-N-acetyltransferase Nat2, putative [Penicillium digitatum Pd1]	41.6	4e-22	sp|Q9URV4|YBL7_SCHPO	Uncharacterized protein C106.07c OS=Schizosaccharomyces pombe (strain 972 / ATCC 24843) GN=SPBC106.07c PE=2 SV=1	81.67	2e-91	B6HF30	B6HF30_PENCW Pc20g00190 protein OS=Penicillium chrysogenum (strain ATCC 28089 / DSM 1075 / Wisconsin 54-1255) GN=Pc20g00190 PE=4 SV=1	-	-	-	-	-	-	-	K00670|1|1e-15|82.0|sce:YGR147C|peptide alpha-N-acetyltransferase [EC:2.3.1.88]	-	GO:0016740//transferase activity	-
27	gi|425774238|gb|EKV12552.1|	hypothetical protein PDIP_52270 [Penicillium digitatum Pd1]	10063	MSSYIITCKPDATDDQVQAVKYHAKEQGGIIGHEYSLIKGFVVSFPKGTVHSLDSNPHVEHIEVDQEVKTQ	168	19.7	-	3	3	1	1	1.81	1.593	3	3	*	-	1.7015	0.153442	gi|425774238|gb|EKV12552.1|	100	2e-34	gi|425774238|gb|EKV12552.1|	hypothetical protein PDIP_52270 [Penicillium digitatum Pd1] >gi|425776334|gb|EKV14556.1| hypothetical protein PDIG_32700 [Penicillium digitatum PHI26]	36.23	1e-05	sp|O74989|YJZC_SCHPO	Uncharacterized protein C338.12 OS=Schizosaccharomyces pombe (strain 972 / ATCC 24843) GN=SPCC338.12 PE=2 SV=1	64.79	2e-17	B6HQC6	B6HQC6_PENCW Pc22g15880 protein OS=Penicillium chrysogenum (strain ATCC 28089 / DSM 1075 / Wisconsin 54-1255) GN=Pc22g15880 PE=4 SV=1	-	-	-	-	-	-	-	-	GO:0043086//negative regulation of catalytic activity	GO:0042802//identical protein binding;GO:0004252//serine-type endopeptidase activity	-
28	gi|425765840|gb|EKV04486.1|	MRNA decapping hydrolase, putative [Penicillium digitatum Pd1]	43504	MVDSLDTDKLAPEALITKFQVSKLLKQDQNGRRIALLGTIDNTQGILTAERAAFATESLAVLQAFHSAISRINNLGDNDIYRWYLASSSGNSDPTPAEASTNPHQDLKLNLIWPCTAQHIKKYSDQQLRMVTETAEIYRTHVRPYMQAKREEGRLNWVFNILEGRTEQEDVILRDEGHGPQDGFLMLPDLNWDRKSVGSLHLLALVQRRDIWSLRDLKKSFVPWLKYLRKRVLEATVSMYPALEEDQIKLYVHYQPTYYHFHIHVVHVMLEAGATQATGKAFGLENLISQLETLSGDGDASLADVDLTYFLGEAHELWTEIFEPLKQGKHPSR	140	25.8	-	7	7	6	6	1.298	1.598	6	5	-	*	1.448	0.212132	gi|425765840|gb|EKV04486.1|	100	0	gi|425765840|gb|EKV04486.1|	MRNA decapping hydrolase, putative [Penicillium digitatum Pd1] >gi|425766885|gb|EKV05478.1| MRNA decapping hydrolase, putative [Penicillium digitatum PHI26]	37.27	4e-52	sp|Q06151|DCPS_YEAST	m7GpppX diphosphatase OS=Saccharomyces cerevisiae (strain ATCC 204508 / S288c) GN=DCS1 PE=1 SV=1	93.11	0	B6HT31	B6HT31_PENCW Pc22g08720 protein OS=Penicillium chrysogenum (strain ATCC 28089 / DSM 1075 / Wisconsin 54-1255) GN=Pc22g08720 PE=4 SV=1	YLR270w	205	1e-52	COG5075	Uncharacterized conserved protein	S	Function unknown ;	K12584|1|0.0|645|pcs:Pc22g08720|scavenger mRNA-decapping enzyme DcpS [EC:3.-.-.-]	GO:0000290//deadenylation-dependent decapping of nuclear-transcribed mRNA	GO:0016787//hydrolase activity	-
29	gi|425778331|gb|EKV16463.1|	hypothetical protein PDIP_35740 [Penicillium digitatum Pd1]	53380	MFQSSKPYSAVTVQIEVLTSEQYEVEDSSGIVDLVEVVRIQASGPMEASRALRKKLKYGNVHRQLRALTILDYLVQNAGERFLLDFADEALLERLRIAATDSVSDPLVKQKCKQIFGQWATTYKDTPGMAKVTALYKQLPKRKQPATQAKAKVLREGSSSNELPVMGHVVSVSGGSGPSTLLTSPKENSKPKKVKKDKKLSISYRRFDLEKERPEILQALAASSVASTNLLNALKHVNRETHRVGDDAECSNRFEKCKELRHTILRYIQHIETEEFLGGLIHANEELVDALMAFEVLDKSVDYDSDSEDDVLEGNWKQRHGLGLNDTDVNDGFAGLSINPAKPPRPNRPVSLPLASSSQHTRQIFDSESESEEEEDDDDNPFGDRNAIKSQAI	66	9.9	-	3	3	3	3	1.035	1.533	3	3	-	*	1.284	0.352139	gi|425778331|gb|EKV16463.1|	100	0	gi|425774209|gb|EKV12526.1|	hypothetical protein PDIG_44500 [Penicillium digitatum PHI26] >gi|425778331|gb|EKV16463.1| hypothetical protein PDIP_35740 [Penicillium digitatum Pd1]	32.54	3e-36	sp|P87308|LSB5_SCHPO	Protein lsb5 OS=Schizosaccharomyces pombe (strain 972 / ATCC 24843) GN=lsb5 PE=2 SV=1	72.67	6e-113	G3YAS3	G3YAS3_ASPNA Putative uncharacterized protein (Fragment) OS=Aspergillus niger (strain ATCC 1015 / CBS 113.46 / FGSC A1144 / LSHB Ac4 / NCTC 3858a / NRRL 328 / USDA 3528.7) GN=ASPNIDRAFT_208913 PE=4 SV=1	-	-	-	-	-	-	-	K12182|1|3e-09|62.4|tml:GSTUM_00000918001|hepatocyte growth factor-regulated tyrosine kinase substrate	-	-
30	gi|425774280|gb|EKV12589.1|	Rho guanyl nucleotide exchange factor (Rom2), putative [Penicillium digitatum Pd1]	129236	MQPSPDESVASRQPSDASQRSRTMSMASTVAPDRTMSVQSQATQASSGQVTLVSRDSQRKVPVVYPALLSLVAEVFREKISLGERQKNGLSYQNAFSGTDSVDLISSIIRTNDRNLALLLGRALDAQKFFHDVTYDHRLRDAPGEVYQFKETMGEDKSTIEVNGVFTLLTECYSPTCNRDTLCYSIACPRRLEQQARLNLKPQQVLGTSESKTALPPDDDDDNDNQKLWISTVPKEVSDSVDDHEKKRQEIIFEVMYTERDFVKDLEYLRDFWMRPLRAAGTATHSPIPEHRREKFIRTVFGNCLEVLKVNSALCEALNARQKESPVVQTIGDIFCQHVPNFDPFIKYGANQLYGKYEFEKEKASNPAFAKFVEDTERLKESRKLELNGYLTKPTTRLA…	69	5.8	-	6	6	4	4	1.509	1.246	6	4	*	*	1.3775	0.185969	gi|425774280|gb|EKV12589.1|	100	0	gi|425776281|gb|EKV14503.1|	Rho guanyl nucleotide exchange factor (Rom2), putative [Penicillium digitatum PHI26]	64.13	1e-28	sp|P51862|ROM2_YEAST	RHO1 GDP-GTP exchange protein 2 OS=Saccharomyces cerevisiae (strain ATCC 204508 / S288c) GN=ROM2 PE=1 SV=1	97.48	0	B6HR54	B6HR54_PENCW Pc22g16480 protein OS=Penicillium chrysogenum (strain ATCC 28089 / DSM 1075 / Wisconsin 54-1255) GN=Pc22g16480 PE=4 SV=1	SPCC645.07	910	0	COG5422	RhoGEF, Guanine nucleotide exchange factor for Rho/Rac/Cdc42-like GTPases	T	Signal transduction mechanisms ;	K11236|1|3e-11|70.1|uma:UM02422.1|cell division control protein 24	GO:0035023//regulation of Rho protein signal transduction	GO:0005089//Rho guanyl-nucleotide exchange factor activity	GO:0005622//intracellular
31	gi|425773071|gb|EKV11444.1|	40S ribosomal protein S24 [Penicillium digitatum Pd1]	21613	MADSPVTLRTRKFIRNPLLARKQMVVDVLHPNRPNVSKDELREKLADLYKSNKDQVSVFGFRTQYGGGKSTGFALVYDSSEALKKFEPHYRLVRIGAASKIEKASRQQRKQRKNRSKKFRGVAKVKGPKKSKD	631	49.6	-	35	35	9	9	1.505	1.432	30	30	*	-	1.4685	0.0516188	gi|425773071|gb|EKV11444.1|	100	8e-60	gi|425773071|gb|EKV11444.1|	40S ribosomal protein S24 [Penicillium digitatum Pd1] >gi|425778826|gb|EKV16931.1| 40S ribosomal protein S24 [Penicillium digitatum PHI26]	74.51	5e-38	sp|P0CX32|RS24B_YEAST	40S ribosomal protein S24-B OS=Saccharomyces cerevisiae (strain ATCC 204508 / S288c) GN=RPS24B PE=1 SV=1	99.25	1e-58	B6HKX2	B6HKX2_PENCW 40S ribosomal protein S24 OS=Penicillium chrysogenum (strain ATCC 28089 / DSM 1075 / Wisconsin 54-1255) GN=Pc21g12010 PE=3 SV=1	YIL069c	184	3e-47	COG2004	Ribosomal protein S24E	J	Translation, ribosomal structure and biogenesis ;	K02974|1|1e-60|229|pcs:Pc21g12010|small subunit ribosomal protein S24e	GO:0000462//maturation of SSU-rRNA from tricistronic rRNA transcript (SSU-rRNA, 5.8S rRNA, LSU-rRNA);GO:0006414//translational elongation	GO:0003735//structural constituent of ribosome;GO:0000166//nucleotide binding	GO:0005730//nucleolus;GO:0022627//cytosolic small ribosomal subunit
32	gi|425773819|gb|EKV12145.1|	GTPase activating protein (Gyp2), putative [Penicillium digitatum Pd1]	140358	MIPWSSFVQKAQSLIDPANFTIPALSSPDHNPSKASLFRQQFRLPDSQNPLQEITADLVLTLPNSSANQGDGSRKVERAGITYTGRLHLSERFICFSTQPTSFIPSATASASTTWTGQTHGTGPSGNGFILPLSCIRRVERLHSANHVFSLALTTWNGLLNKPQEPNFAPQRLILQLVGSRQACERFCDTLKKGLREGMKEVDNVRTVVSDCYSEYLLSGAKGKTQDGKEADARQPPDAGLGLIFRYPGDARKLRDRSKMRLWGEYFRENGRNATLVRQPTFHKLIRVGLPNRLRGEIWELTSGSLFLRINSPKLYQQTLAKFEGQESLAIDEIEKDLNRSLPEYPGFQSEEGIGRLRRVLTAYSWIDPEIGYCQAMNIVVAALLIYMSEAQAFSLLSV…	114	4.2	-	4	4	4	4	1.238	1.644	4	4	-	*	1.441	0.287085	gi|425773819|gb|EKV12145.1|	100	0	gi|425773819|gb|EKV12145.1|	GTPase activating protein (Gyp2), putative [Penicillium digitatum Pd1] >gi|425776083|gb|EKV14318.1| GTPase activating protein (Gyp2), putative [Penicillium digitatum PHI26]	70.92	0	sp|C8VDQ4|GYP2_EMENI	Putative GTPase-activating protein AN11010 OS=Emericella nidulans (strain FGSC A4 / ATCC 38163 / CBS 112.46 / NRRL 194 / M139) GN=AN11010 PE=4 SV=1	91.66	0	B6HVL6	B6HVL6_PENCW Pc22g14970 protein OS=Penicillium chrysogenum (strain ATCC 28089 / DSM 1075 / Wisconsin 54-1255) GN=Pc22g14970 PE=4 SV=1	YGR100w	597	4e-170	COG5210	GTPase-activating protein	R	General function prediction only ;	K02179|1|3e-10|67.4|cgr:CAGL0F06391g|cell cycle arrest protein BUB2	GO:0032851//positive regulation of Rab GTPase activity	GO:0005097//Rab GTPase activator activity;GO:0005509//calcium ion binding	GO:0005622//intracellular
33	gi|425778585|gb|EKV16705.1|	hypothetical protein PDIP_34350 [Penicillium digitatum Pd1]	76630	MVIKALRDDEVFRHEFGIQGQVTFYDRMNLSETSLQNSLEQMNLQDVRTPQRFANTRPGRRRGRGRGAMQGNNRDGTTRRRNRRADQFCVHLMADERQIPIYAVEFKAPHKVTIPELVAGLHQINLARDVINQEGDTFEFHATYLVAAVVTQIFSYMIDIGVQYGYICTGEAFVFLYIPEDDPTVVQYFLCIPNQDVQADDELRLHRTAIGQVLAFTLQALAAKAPSQEWHDAAYDKLETWDVEYLDVLRKIPETLRKDPRASNYRPSHWKLEPKTHNTRSRARCKPDISTPKHSSTEGSGSDEESHSPSIAAAARSGSSRGRGNNRQSTKESESKRAGQNNKQTSRKDGQSTRPYCTIACIRGIVNREPLDQECPNWKLHGGQRHSIGPQEFTRRLHR…	472	12.3	-	15	15	6	6	1.403	1.602	15	15	*	*	1.5025	0.140714	gi|425778585|gb|EKV16705.1|	100	0	gi|425768147|gb|EKV06685.1|	hypothetical protein PDIG_76460 [Penicillium digitatum PHI26] >gi|425778585|gb|EKV16705.1| hypothetical protein PDIP_34350 [Penicillium digitatum Pd1]	-	-	-	-	82.43	0	B6HAW3	B6HAW3_PENCW Pc17g00310 protein OS=Penicillium chrysogenum (strain ATCC 28089 / DSM 1075 / Wisconsin 54-1255) GN=Pc17g00310 PE=4 SV=1	-	-	-	-	-	-	-	-	GO:0008152//metabolic process	GO:0016772//transferase activity, transferring phosphorus-containing groups	-
34	gi|425779117|gb|EKV17206.1|	hypothetical protein PDIP_32220 [Penicillium digitatum Pd1]	15058	MSRKLAPEANRYNVTAEQLFDLFGKFGPIRQIRQGIANTSKGTAFVVYEDVHDAKQACDKLNGFNFQNRYLVVLYHQPEKMVRTKEDITERQENLERLKQQHGIE	77	13.3	-	2	2	1	1	1.724	2.191	2	2	*	-	1.9575	0.330219	gi|425779117|gb|EKV17206.1|	100	7e-57	gi|425766195|gb|EKV04819.1|	hypothetical protein PDIG_86200 [Penicillium digitatum PHI26] >gi|425779117|gb|EKV17206.1| hypothetical protein PDIP_32220 [Penicillium digitatum Pd1]	50.46	2e-25	sp|Q9Y3B4|PM14_HUMAN	Pre-mRNA branch site protein p14 OS=Homo sapiens GN=SF3B14 PE=1 SV=1	92.92	1e-53	B6HSA1	B6HSA1_PENCW Pc22g08360 protein OS=Penicillium chrysogenum (strain ATCC 28089 / DSM 1075 / Wisconsin 54-1255) GN=Pc22g08360 PE=4 SV=1	ECU02g0530	61.2	4e-10	COG0724	RNA-binding proteins (RRM domain)	R	General function prediction only ;	K12833|1|1e-55|213|pcs:Pc22g08360|pre-mRNA branch site protein p14	-	GO:0003676//nucleic acid binding;GO:0000166//nucleotide binding	-
35	gi|425781794|gb|EKV19739.1|	hypothetical protein PDIP_22250 [Penicillium digitatum Pd1]	85294	MADSNAASCPFCPFTDSDANFVSQHIEFCHPETGVTGFLQETPQEFATQISASLPEDEEGADKYVNCPHECGEMIKIAELSSHLDLHAAEAMALDDFGATSARSTADVHDHGYDGLFDEDSLDILDSHKGGKRGMQRDSSRVNTAKPPRPHSPLRTTNADGIKRLGRSELGPHAHEKKMPSWLKKMLEKGGSISKQTQITSDGKFTRRETVENETDHLIPVLTRLCEQDKSVQRAFFCSPKVRHICKMRREGGFCGYRNIQMMVSWLKKSRGFGHEHFPNKGPTILELQDMIESAWDMGFNSSGRAETGGIKDTRKFIGTPEAQALFMSLGIPCEARSLSESSDLRACDALYIDVADYFRSACSPEDETKIVQTDLPPIYFQHQGHSMTIIGFEIRDNG…	71	5.3	-	3	3	3	3	1.317	1.537	3	3	*	*	1.427	0.155563	gi|425781794|gb|EKV19739.1|	100	0	gi|425766589|gb|EKV05193.1|	hypothetical protein PDIG_84590 [Penicillium digitatum PHI26] >gi|425781794|gb|EKV19739.1| hypothetical protein PDIP_22250 [Penicillium digitatum Pd1]	50.88	9e-35	sp|Q9UU88|KAD6_SCHPO	Putative adenylate kinase fap7 OS=Schizosaccharomyces pombe (strain 972 / ATCC 24843) GN=fap7 PE=2 SV=1	96.05	9e-89	B6HG07	B6HG07_PENCW Pc20g00600 protein OS=Penicillium chrysogenum (strain ATCC 28089 / DSM 1075 / Wisconsin 54-1255) GN=Pc20g00600 PE=4 SV=1	YDL166c	172	2e-42	COG1936	Predicted nucleotide kinase (related to CMP and AMP kinases)	F	Nucleotide transport and metabolism ;	K14535|1|1e-90|333|pcs:Pc20g00600|transcription initiation factor TFIID subunit 9 / adenylate kinase [EC:2.7.4.3]	-	-
36	gi|425774648|gb|EKV12950.1|	Protein yop1 [Penicillium digitatum Pd1]	21093	MASFQERAQHSIAQLDKELSKYPVLANLERQTNVPKVYVVLGLVGIYFFLVFFNIAGEFLVNFAGFLVPGYYSLQALFTSSTKDDTQYWVVFAFLTVIESAISAAYWFPFYYIFKFVLIMWMALPQTSGAQIVFHSFLQPVVGRFFSNNGTSSNLRAQAEAASKAHST	104	5.4	-	7	7	1	1	1.567	1.782	6	6	*	*	1.6745	0.152028	gi|425774648|gb|EKV12950.1|	100	5e-93	gi|425774648|gb|EKV12950.1|	Protein yop1 [Penicillium digitatum Pd1] >gi|425776507|gb|EKV14724.1| Protein yop1 [Penicillium digitatum PHI26]	81.66	1e-77	sp|Q4WTW3|YOP1_ASPFU	Protein yop1 OS=Neosartorya fumigata (strain ATCC MYA-4609 / Af293 / CBS 101355 / FGSC A1100) GN=yop1 PE=3 SV=1	94.15	1e-87	B6HHY1	B6HHY1_PENCW Pc21g01130 protein OS=Penicillium chrysogenum (strain ATCC 28089 / DSM 1075 / Wisconsin 54-1255) GN=Pc21g01130 PE=4 SV=1	YPR028w	124	6e-29	COG5052	Protein involved in membrane traffic	U	Intracellular trafficking, secretion, and vesicular transport ;	-	-	-	GO:0016021//integral to membrane
37	gi|425766735|gb|EKV05334.1|	ATP synthase delta chain, mitochondrial, putative [Penicillium digitatum Pd1]	20061	MSSFRFTRSALRARPSFLGAPVQRRGYAEAVADKIKLSLTLPHQTIYRSTGVTQVNIPAASGEMGVLANHVPAIEQLKPGLVEIIEESGATKQYFLSGGFAVVQPDSQLSINAVEGFALEDFSADAIRAQIAEAQKIASGSGSEQDIAEAKIELEVLETLQAHVK	393	24.8	-	15	15	3	3	1.682	1.569	15	14	*	*	1.6255	0.0799031	gi|425766735|gb|EKV05334.1|	100	4e-90	gi|425766735|gb|EKV05334.1|	ATP synthase delta chain, mitochondrial, putative [Penicillium digitatum Pd1] >gi|425775257|gb|EKV13535.1| ATP synthase delta chain, mitochondrial, putative [Penicillium digitatum PHI26]	78.79	3e-72	sp|P56525|ATPD_NEUCR	ATP synthase subunit delta, mitochondrial OS=Neurospora crassa (strain ATCC 24698 / 74-OR23-1A / CBS 708.71 / DSM 1257 / FGSC 987) GN=atp-16 PE=3 SV=2	96.15	7e-81	B6HSK3	B6HSK3_PENCW Pc22g25650 protein OS=Penicillium chrysogenum (strain ATCC 28089 / DSM 1075 / Wisconsin 54-1255) GN=Pc22g25650 PE=3 SV=1	YDL004w	145	3e-35	COG0355	F0F1-type ATP synthase, epsilon subunit (mitochondrial delta subunit)	C	Energy production and conversion ;	K02134|1|1e-82|303|pcs:Pc22g25650|F-type H+-transporting ATPase subunit delta [EC:3.6.3.14]	GO:0042777//plasma membrane ATP synthesis coupled proton transport;GO:0006200//ATP catabolic process	GO:0046961//proton-transporting ATPase activity, rotational mechanism;GO:0046933//proton-transporting ATP synthase activity, rotational mechanism;GO:0005524//ATP binding	GO:0005756//mitochondrial proton-transporting ATP synthase, central stalk;GO:0005886//plasma membrane
38	gi|425765473|gb|EKV04153.1|	hypothetical protein PDIP_88500 [Penicillium digitatum Pd1]	34062	MFKVGPEFEKTQASRPDFRRDTEITYTKSPNPTWKEGDGANDNGESLEKDHVEIDPNEEGRPVTSNYKFLISGMVPRPIALVSTQSADGKSTNLAPFSYAQVINHDPPLFTVGFSGSMERAKDSLRNLNETGECVINIISEHFIEAANSTAINAPYGVSEWETSGLHQAPTSVVKPARVKESILSIEGKLVELKEFESRVTPGKKSGVLAIIEGVRFWVRDDAINEERSIVDLKVLKPISRLGGISYGRTTEAMEIPRPQF	99	7.7	-	3	3	2	2	1.755	1.65	3	3	*	*	1.7025	0.0742462	gi|425765473|gb|EKV04153.1|	100	9e-151	gi|425765473|gb|EKV04153.1|	hypothetical protein PDIP_88500 [Penicillium digitatum Pd1] >gi|425778345|gb|EKV16476.1| hypothetical protein PDIG_20690 [Penicillium digitatum PHI26]	35.18	9e-22	sp|Q9KAK9|Y2278_BACHD	Uncharacterized protein BH2278 OS=Bacillus halodurans (strain ATCC BAA-125 / DSM 18197 / FERM 7344 / JCM 9153 / C-125) GN=BH2278 PE=3 SV=1	93.49	8e-142	B6GW63	B6GW63_PENCW Pc06g01260 protein OS=Penicillium chrysogenum (strain ATCC 28089 / DSM 1075 / Wisconsin 54-1255) GN=Pc06g01260 PE=4 SV=1	PA1644	114	1e-25	COG1853	Conserved protein/domain typically associated with flavoprotein oxygenases, DIM6/NTAB family	R	General function prediction only ;	-	GO:0055114//oxidation-reduction process	GO:0010181//FMN binding;GO:0042602//riboflavin reductase (NADPH) activity	-
39	gi|425782504|gb|EKV20410.1|	HD family hydrolase, putative [Penicillium digitatum Pd1]	29085	MASDTSTWTPETVLSTLPYRPEENSESPVPFFHLIERLKTTKREGWRRFGIDNGESISDHMYRMSIMTMMAPPSLAAKINIPRCIKMALIHDMAEALVGDITPVDGITKAEKARREASVMDYITTTLLGKVPGGALSGGEIKEIFEEYEADKSDEAHFVHDIDKMELLLQMVEYERLHKIDLTEFMHVKDRIQLTPIKEWADEVIRGRPKKA	100	17.5	-	7	7	3	3	1.94	1.614	6	6	*	-	1.777	0.230517	gi|425782504|gb|EKV20410.1|	100	2e-121	gi|425774021|gb|EKV12344.1|	HD family hydrolase, putative [Penicillium digitatum PHI26] >gi|425782504|gb|EKV20410.1| HD family hydrolase, putative [Penicillium digitatum Pd1]	47.34	3e-37	sp|P87242|YC0H_SCHPO	HD domain-containing protein C4G3.17 OS=Schizosaccharomyces pombe (strain 972 / ATCC 24843) GN=SPCC4G3.17 PE=2 SV=1	81.6	4e-94	B6HH14	B6HH14_PENCW Pc20g13770 protein OS=Penicillium chrysogenum (strain ATCC 28089 / DSM 1075 / Wisconsin 54-1255) GN=Pc20g13770 PE=4 SV=1	SPCC4G3.17	154	7e-38	COG1896	Predicted hydrolases of HD superfamily	R	General function prediction only ;	K07023|1|6e-96|348|pcs:Pc20g13770|putative hydrolases of HD superfamily	GO:0008152//metabolic process	GO:0046872//metal ion binding;GO:0008081//phosphoric diester hydrolase activity	-
40	gi|425783989|gb|EKV21800.1|	Small nuclear ribonucleoprotein SmG, putative [Penicillium digitatum Pd1]	14569	MPQAQPELKKVSVSHLMYMEKRVFCQLNGNRKVIGVLRGYDVFMNIVLDEAFEEKDGGEKVSAGMVVRSSLFTDAKNPANACRYQVIRGNSIVMLEALERITDK	129	11.5	-	4	4	1	1	1.267	1.522	4	4	-	*	1.3945	0.180312	gi|425783989|gb|EKV21800.1|	100	2e-55	gi|425783989|gb|EKV21800.1|	Small nuclear ribonucleoprotein SmG, putative [Penicillium digitatum Pd1]	45.92	1e-12	sp|Q9N4G9|RUXG_CAEEL	Probable small nuclear ribonucleoprotein G OS=Caenorhabditis elegans GN=snr-7 PE=2 SV=1	75.76	1e-19	C5P095	C5P095_COCP7 LSM domain containing protein OS=Coccidioides posadasii (strain C735) GN=CPC735_074220 PE=4 SV=1	YFL017w-a	73.2	1e-13	COG1958	Small nuclear ribonucleoprotein (snRNP) homolog	K	Transcription ;	K11099|1|1e-33|140|pcs:Pc20g10480|small nuclear ribonucleoprotein G	-	-
41	gi|425766416|gb|EKV05028.1|	hypothetical protein PDIP_85200 [Penicillium digitatum Pd1]	43729	MAFYGLLGQPEEALTDALHKSRLLNVEEKPFKRISKRLLNPESLIVSPSSLPLTPPTDETDADSDATATEAEKQKRLEEWRHFREDVSLDFAAFEGSIARVQFLLTSNELERQRYATERVQILSTMQSVRESTADLRSQLEEAQRLLSLRKTYDELTDKITSNRLLKPREDQSANLQKLRLEIADLEKESKDYAMTWAERREQFGRIVEEGMQLRRLIRDEKEEVERREGMQEGEDGDEGDVTSKGKASSGNTPGPEIDEVTPSQHGQDEAGRSSALQVEKAGAAGAASPLRQITTAQGDGAREDTNMLDEGEISAVSDGELSELEEGEELPDDFSGKMDTT	52	5.8	-	2	2	2	2	1.231	1.757	2	2	-	*	1.494	0.371938	gi|425766416|gb|EKV05028.1|	100	3e-163	gi|425766416|gb|EKV05028.1|	hypothetical protein PDIP_85200 [Penicillium digitatum Pd1] >gi|425775192|gb|EKV13474.1| hypothetical protein PDIG_38560 [Penicillium digitatum PHI26]	-	-	-	-	93	2e-147	B6H2B2	B6H2B2_PENCW Pc13g04580 protein OS=Penicillium chrysogenum (strain ATCC 28089 / DSM 1075 / Wisconsin 54-1255) GN=Pc13g04580 PE=4 SV=1	-	-	-	-	-	-	-	K13176|1|2e-44|178|pan:PODANSg09970|THO complex subunit 7	-	-
